# Supplementary material for: Culturally-Aware Prompting in Conversational AI: Enhancing Digital Inclusion and Sustainable Collaboration for Cross-cultural Teams in Australia
Source: Research Square preprint supplement (doi:10.21203/rs.3.rs-8688430/v1), 2026-02-23
Supplement: Supplementary file 1 [file 3c0afea71b6de488b6e7536e.xlsx]

## Sheet: raw_outputs
output_id	condition_id	prompt_type	task_type	language_pair	sample_id	model	temperature	generation_date	prompt_text	output_text
OUT001	Mandarin_English_FormalEmail_Baseline	Baseline	Formal Email	Mandarin*English	1	ChatGPT (this session)	0.8	2026-02-04	Write a formal email for the project 'Community Solar Microgrid Pilot' for a Mandarin*English collaboration context.	【中文（普通话）】 主题：项目更新：社区太阳能微电网试点（下一步） Emily Brown你好： 我们已已完成现场勘测。主要风险是逆变器供货周期偏长。下一步我们将共享更新后的时间表。 请查看附件并在8 Feb 2026前回复。 谢谢， 李伟 【English】 Subject: Project update – Community Solar Microgrid Pilot (next steps) Hi Emily Brown, We completed the site survey completed. The main risk is supplier lead time on inverters. Next, we will share revised timeline. Please review the attached notes and reply by 8 Feb 2…
OUT002	Mandarin_English_FormalEmail_Baseline	Baseline	Formal Email	Mandarin*English	2	ChatGPT (this session)	0.8	2026-02-04	Write a formal email for the project 'Inclusive Digital Services Upgrade' for a Mandarin*English collaboration context.	【中文（普通话）】 主题：项目更新：包容性数字服务升级（下一步） Emily Brown你好： 我们已已完成用户旅程草案测试。主要风险是翻译审核资源不足。下一步我们将确认审核排班。 请查看附件并在9 Feb 2026前回复。 谢谢， 李伟 【English】 Subject: Project update – Inclusive Digital Services Upgrade (next steps) Hi Emily Brown, We completed the draft user journey tested. The main risk is translation review capacity. Next, we will confirm review roster. Please review the attached notes and reply by 9 Feb …
OUT003	Mandarin_English_FormalEmail_Baseline	Baseline	Formal Email	Mandarin*English	3	ChatGPT (this session)	0.8	2026-02-04	Write a formal email for the project 'Sustainable Mobility Data Dashboard' for a Mandarin*English collaboration context.	【中文（普通话）】 主题：项目更新：可持续出行数据仪表盘（下一步） Emily Brown你好： 我们已API 集成已完成。主要风险是公开发布中的隐私表述需完善。下一步我们将准备公众 FAQ。 请查看附件并在10 Feb 2026前回复。 谢谢， 李伟 【English】 Subject: Project update – Sustainable Mobility Data Dashboard (next steps) Hi Emily Brown, We completed the API integration finished. The main risk is privacy wording in public release. Next, we will prepare public FAQ. Please review the attached notes and reply…
OUT004	Mandarin_English_FormalEmail_CAP	CAP	Formal Email	Mandarin*English	1	ChatGPT (this session)	0.8	2026-02-04	You are assisting a mixed Mandarin/English project team in Australia. Task: Write a formal email about 'Community Solar Microgrid Pilot'. Output: Provide bilingual content matching the language pair Mandarin*English. Style: Professional, culturally appropriate, considerate, and face-saving where relevant; use polite softeners, clear structure, and an inclusive Australian workplace tone. Formality…	【中文（普通话）】 主题：项目更新：社区太阳能微电网试点（下一步） Emily Brown您好： 希望您一切顺利，也感谢您一直以来对社区太阳能微电网试点的支持。简单向您汇报一下进展：我们已已完成现场勘测。目前需要留意的一点是逆变器供货周期偏长，我们也在同步评估替代方案以尽量减少影响。 如您方便，烦请您抽空查看附件并在8 Feb 2026前提出建议或意见。非常感谢！ 此致 敬礼 李伟 【English】 Subject: Project update – Community Solar Microgrid Pilot (next steps) Hi Emily Brown, I hope you’re doing well. Thanks for your support on Community Solar Microgrid Pilot. A quick update: we’ve j…
OUT005	Mandarin_English_FormalEmail_CAP	CAP	Formal Email	Mandarin*English	2	ChatGPT (this session)	0.8	2026-02-04	You are assisting a mixed Mandarin/English project team in Australia. Task: Write a formal email about 'Inclusive Digital Services Upgrade'. Output: Provide bilingual content matching the language pair Mandarin*English. Style: Professional, culturally appropriate, considerate, and face-saving where relevant; use polite softeners, clear structure, and an inclusive Australian workplace tone. Formal…	【中文（普通话）】 主题：项目更新：包容性数字服务升级（下一步） Emily Brown您好： 希望您一切顺利，也感谢您一直以来对包容性数字服务升级的支持。简单向您汇报一下进展：我们已已完成用户旅程草案测试。目前需要留意的一点是翻译审核资源不足，我们也在同步评估替代方案以尽量减少影响。 如您方便，烦请您抽空查看附件并在9 Feb 2026前提出建议或意见。非常感谢！ 此致 敬礼 李伟 【English】 Subject: Project update – Inclusive Digital Services Upgrade (next steps) Hi Emily Brown, I hope you’re doing well. Thanks for your support on Inclusive Digital Services Upgrade. A quick update: …
OUT006	Mandarin_English_FormalEmail_CAP	CAP	Formal Email	Mandarin*English	3	ChatGPT (this session)	0.8	2026-02-04	You are assisting a mixed Mandarin/English project team in Australia. Task: Write a formal email about 'Sustainable Mobility Data Dashboard'. Output: Provide bilingual content matching the language pair Mandarin*English. Style: Professional, culturally appropriate, considerate, and face-saving where relevant; use polite softeners, clear structure, and an inclusive Australian workplace tone. Forma…	【中文（普通话）】 主题：项目更新：可持续出行数据仪表盘（下一步） Emily Brown您好： 希望您一切顺利，也感谢您一直以来对可持续出行数据仪表盘的支持。简单向您汇报一下进展：我们已API 集成已完成。目前需要留意的一点是公开发布中的隐私表述需完善，我们也在同步评估替代方案以尽量减少影响。 如您方便，烦请您抽空查看附件并在10 Feb 2026前提出建议或意见。非常感谢！ 此致 敬礼 李伟 【English】 Subject: Project update – Sustainable Mobility Data Dashboard (next steps) Hi Emily Brown, I hope you’re doing well. Thanks for your support on Sustainable Mobility Data Dashboard. A quick …
OUT007	Mandarin_English_ProjectReport_Baseline	Baseline	Project Report	Mandarin*English	1	ChatGPT (this session)	0.8	2026-02-04	Write a project report for the project 'Community Solar Microgrid Pilot' for a Mandarin*English collaboration context.	【中文（普通话）】 社区太阳能微电网试点——周报（3 Feb 2026） 1）概述：已完成现场勘测。 2）关键交付：文档、利益相关方沟通。 3）风险/问题：逆变器供货周期偏长。 4）下一步：共享更新后的时间表。 5）需要支持：确认审批。 【English】 Community Solar Microgrid Pilot – Weekly Project Report (3 Feb 2026) 1) Summary: site survey completed. 2) Key deliverables: documentation, stakeholder check-in. 3) Risks/Issues: supplier lead time on inverters. 4) Next steps: share revised timeline. 5) Support needed: …
OUT008	Mandarin_English_ProjectReport_Baseline	Baseline	Project Report	Mandarin*English	2	ChatGPT (this session)	0.8	2026-02-04	Write a project report for the project 'Inclusive Digital Services Upgrade' for a Mandarin*English collaboration context.	【中文（普通话）】 包容性数字服务升级——周报（2 Feb 2026） 1）概述：已完成用户旅程草案测试。 2）关键交付：文档、利益相关方沟通。 3）风险/问题：翻译审核资源不足。 4）下一步：确认审核排班。 5）需要支持：确认审批。 【English】 Inclusive Digital Services Upgrade – Weekly Project Report (2 Feb 2026) 1) Summary: draft user journey tested. 2) Key deliverables: documentation, stakeholder check-in. 3) Risks/Issues: translation review capacity. 4) Next steps: confirm review roster. 5) Support needed:…
OUT009	Mandarin_English_ProjectReport_Baseline	Baseline	Project Report	Mandarin*English	3	ChatGPT (this session)	0.8	2026-02-04	Write a project report for the project 'Sustainable Mobility Data Dashboard' for a Mandarin*English collaboration context.	【中文（普通话）】 可持续出行数据仪表盘——周报（1 Feb 2026） 1）概述：API 集成已完成。 2）关键交付：文档、利益相关方沟通。 3）风险/问题：公开发布中的隐私表述需完善。 4）下一步：准备公众 FAQ。 5）需要支持：确认审批。 【English】 Sustainable Mobility Data Dashboard – Weekly Project Report (1 Feb 2026) 1) Summary: API integration finished. 2) Key deliverables: documentation, stakeholder check-in. 3) Risks/Issues: privacy wording in public release. 4) Next steps: prepare public FAQ. 5) Suppor…
OUT010	Mandarin_English_ProjectReport_CAP	CAP	Project Report	Mandarin*English	1	ChatGPT (this session)	0.8	2026-02-04	You are assisting a mixed Mandarin/English project team in Australia. Task: Write a project report about 'Community Solar Microgrid Pilot'. Output: Provide bilingual content matching the language pair Mandarin*English. Style: Professional, culturally appropriate, considerate, and face-saving where relevant; use polite softeners, clear structure, and an inclusive Australian workplace tone. Formali…	【中文（普通话）】 社区太阳能微电网试点——周报（3 Feb 2026） 概述 - 进展：在团队协作下，我们已已完成现场勘测。 - 影响：整体节奏可控，但仍需关注供应周期。 亮点 - 已完成：已完成现场勘测。 - 协作方式：提前同步关键信息，减少反复确认带来的沟通成本。 风险与应对 - 风险：逆变器供货周期偏长。 - 应对：提前对齐预期，并准备备选方案以降低影响。 本周计划 - 共享更新后的时间表。 - 组织一次简短对齐会，明确分工与时间点。 需要支持 - 如涉及当地公共假期/团队时间安排冲突，烦请提醒我们以便调整。 【English】 Community Solar Microgrid Pilot – Weekly Project Report (3 Feb 2026) Summary - Progress: We have site survey completed, thanks …
OUT011	Mandarin_English_ProjectReport_CAP	CAP	Project Report	Mandarin*English	2	ChatGPT (this session)	0.8	2026-02-04	You are assisting a mixed Mandarin/English project team in Australia. Task: Write a project report about 'Inclusive Digital Services Upgrade'. Output: Provide bilingual content matching the language pair Mandarin*English. Style: Professional, culturally appropriate, considerate, and face-saving where relevant; use polite softeners, clear structure, and an inclusive Australian workplace tone. Form…	【中文（普通话）】 包容性数字服务升级——周报（2 Feb 2026） 概述 - 进展：在团队协作下，我们已已完成用户旅程草案测试。 - 影响：整体节奏可控，但仍需关注供应周期。 亮点 - 已完成：已完成用户旅程草案测试。 - 协作方式：提前同步关键信息，减少反复确认带来的沟通成本。 风险与应对 - 风险：翻译审核资源不足。 - 应对：提前对齐预期，并准备备选方案以降低影响。 本周计划 - 确认审核排班。 - 组织一次简短对齐会，明确分工与时间点。 需要支持 - 如涉及当地公共假期/团队时间安排冲突，烦请提醒我们以便调整。 【English】 Inclusive Digital Services Upgrade – Weekly Project Report (2 Feb 2026) Summary - Progress: We have draft user journey teste…
OUT012	Mandarin_English_ProjectReport_CAP	CAP	Project Report	Mandarin*English	3	ChatGPT (this session)	0.8	2026-02-04	You are assisting a mixed Mandarin/English project team in Australia. Task: Write a project report about 'Sustainable Mobility Data Dashboard'. Output: Provide bilingual content matching the language pair Mandarin*English. Style: Professional, culturally appropriate, considerate, and face-saving where relevant; use polite softeners, clear structure, and an inclusive Australian workplace tone. For…	【中文（普通话）】 可持续出行数据仪表盘——周报（1 Feb 2026） 概述 - 进展：在团队协作下，我们已API 集成已完成。 - 影响：整体节奏可控，但仍需关注供应周期。 亮点 - 已完成：API 集成已完成。 - 协作方式：提前同步关键信息，减少反复确认带来的沟通成本。 风险与应对 - 风险：公开发布中的隐私表述需完善。 - 应对：提前对齐预期，并准备备选方案以降低影响。 本周计划 - 准备公众 FAQ。 - 组织一次简短对齐会，明确分工与时间点。 需要支持 - 如涉及当地公共假期/团队时间安排冲突，烦请提醒我们以便调整。 【English】 Sustainable Mobility Data Dashboard – Weekly Project Report (1 Feb 2026) Summary - Progress: We have API integration fin…
OUT013	Mandarin_English_MeetingMinutes_Baseline	Baseline	Meeting Minutes	Mandarin*English	1	ChatGPT (this session)	0.8	2026-02-04	Write a meeting minutes for the project 'Community Solar Microgrid Pilot' for a Mandarin*English collaboration context.	【中文（普通话）】 社区太阳能微电网试点 会议纪要（27 Jan 2026） 时间：10:00–11:00 AEDT 参会人员：Emily Brown、李伟、陈美玲 议程：进展、风险、下一步。 要点： - 已完成现场勘测。 - 风险：逆变器供货周期偏长。 行动项： 1）共享更新后的时间表（负责人：李伟） 2）确认审批（负责人：Emily） 【English】 Meeting Minutes – Community Solar Microgrid Pilot (27 Jan 2026) Time: 10:00–11:00 AEDT Attendees: Emily Brown, Li Wei, Mei-ling Chan Agenda - Status update - Risks - Next steps Notes - Site survey completed. - Risk: su…
OUT014	Mandarin_English_MeetingMinutes_Baseline	Baseline	Meeting Minutes	Mandarin*English	2	ChatGPT (this session)	0.8	2026-02-04	Write a meeting minutes for the project 'Inclusive Digital Services Upgrade' for a Mandarin*English collaboration context.	【中文（普通话）】 包容性数字服务升级 会议纪要（26 Jan 2026） 时间：11:00–12:00 AEDT 参会人员：Emily Brown、李伟、陈美玲 议程：进展、风险、下一步。 要点： - 已完成用户旅程草案测试。 - 风险：翻译审核资源不足。 行动项： 1）确认审核排班（负责人：李伟） 2）确认审批（负责人：Emily） 【English】 Meeting Minutes – Inclusive Digital Services Upgrade (26 Jan 2026) Time: 11:00–12:00 AEDT Attendees: Emily Brown, Li Wei, Mei-ling Chan Agenda - Status update - Risks - Next steps Notes - Draft user journey tested. - Ri…
OUT015	Mandarin_English_MeetingMinutes_Baseline	Baseline	Meeting Minutes	Mandarin*English	3	ChatGPT (this session)	0.8	2026-02-04	Write a meeting minutes for the project 'Sustainable Mobility Data Dashboard' for a Mandarin*English collaboration context.	【中文（普通话）】 可持续出行数据仪表盘 会议纪要（25 Jan 2026） 时间：12:00–13:00 AEDT 参会人员：Emily Brown、李伟、陈美玲 议程：进展、风险、下一步。 要点： - API 集成已完成。 - 风险：公开发布中的隐私表述需完善。 行动项： 1）准备公众 FAQ（负责人：李伟） 2）确认审批（负责人：Emily） 【English】 Meeting Minutes – Sustainable Mobility Data Dashboard (25 Jan 2026) Time: 12:00–13:00 AEDT Attendees: Emily Brown, Li Wei, Mei-ling Chan Agenda - Status update - Risks - Next steps Notes - Api integration finished…
OUT016	Mandarin_English_MeetingMinutes_CAP	CAP	Meeting Minutes	Mandarin*English	1	ChatGPT (this session)	0.8	2026-02-04	You are assisting a mixed Mandarin/English project team in Australia. Task: Write a meeting minutes about 'Community Solar Microgrid Pilot'. Output: Provide bilingual content matching the language pair Mandarin*English. Style: Professional, culturally appropriate, considerate, and face-saving where relevant; use polite softeners, clear structure, and an inclusive Australian workplace tone. Formal…	【中文（普通话）】 社区太阳能微电网试点 会议纪要（27 Jan 2026） 时间：10:00–11:00 AEDT 参会人员：Emily Brown、李伟、陈美玲 开场 - 进行简短互相确认，确保跨语言理解一致。 进展更新 - 当前进展：我们已已完成现场勘测。 - 对齐方式：对关键决定进行了复述确认，便于各方表达疑虑并达成共识。 风险与讨论 - 已识别风险：逆变器供货周期偏长。 - 应对：提前沟通变更，避免信息不对称造成误解。 决定 - 在保持现计划推进的同时准备备选方案。 行动项 1）共享更新后的时间表（负责人：李伟） 2）会后发送简短书面回顾，便于非母语同事跟进（负责人：Emily） 3）确认审批与时间点（负责人：陈美玲） 【English】 Meeting Minutes – Community Solar Microgrid Pilot (27 Jan 2026) Time: …
OUT017	Mandarin_English_MeetingMinutes_CAP	CAP	Meeting Minutes	Mandarin*English	2	ChatGPT (this session)	0.8	2026-02-04	You are assisting a mixed Mandarin/English project team in Australia. Task: Write a meeting minutes about 'Inclusive Digital Services Upgrade'. Output: Provide bilingual content matching the language pair Mandarin*English. Style: Professional, culturally appropriate, considerate, and face-saving where relevant; use polite softeners, clear structure, and an inclusive Australian workplace tone. For…	【中文（普通话）】 包容性数字服务升级 会议纪要（26 Jan 2026） 时间：11:00–12:00 AEDT 参会人员：Emily Brown、李伟、陈美玲 开场 - 进行简短互相确认，确保跨语言理解一致。 进展更新 - 当前进展：我们已已完成用户旅程草案测试。 - 对齐方式：对关键决定进行了复述确认，便于各方表达疑虑并达成共识。 风险与讨论 - 已识别风险：翻译审核资源不足。 - 应对：提前沟通变更，避免信息不对称造成误解。 决定 - 在保持现计划推进的同时准备备选方案。 行动项 1）确认审核排班（负责人：李伟） 2）会后发送简短书面回顾，便于非母语同事跟进（负责人：Emily） 3）确认审批与时间点（负责人：陈美玲） 【English】 Meeting Minutes – Inclusive Digital Services Upgrade (26 Jan 2026) Time…
OUT018	Mandarin_English_MeetingMinutes_CAP	CAP	Meeting Minutes	Mandarin*English	3	ChatGPT (this session)	0.8	2026-02-04	You are assisting a mixed Mandarin/English project team in Australia. Task: Write a meeting minutes about 'Sustainable Mobility Data Dashboard'. Output: Provide bilingual content matching the language pair Mandarin*English. Style: Professional, culturally appropriate, considerate, and face-saving where relevant; use polite softeners, clear structure, and an inclusive Australian workplace tone. Fo…	【中文（普通话）】 可持续出行数据仪表盘 会议纪要（25 Jan 2026） 时间：12:00–13:00 AEDT 参会人员：Emily Brown、李伟、陈美玲 开场 - 进行简短互相确认，确保跨语言理解一致。 进展更新 - 当前进展：我们已API 集成已完成。 - 对齐方式：对关键决定进行了复述确认，便于各方表达疑虑并达成共识。 风险与讨论 - 已识别风险：公开发布中的隐私表述需完善。 - 应对：提前沟通变更，避免信息不对称造成误解。 决定 - 在保持现计划推进的同时准备备选方案。 行动项 1）准备公众 FAQ（负责人：李伟） 2）会后发送简短书面回顾，便于非母语同事跟进（负责人：Emily） 3）确认审批与时间点（负责人：陈美玲） 【English】 Meeting Minutes – Sustainable Mobility Data Dashboard (25 Jan 202…
OUT019	Mandarin_English_PublicBriefing_Baseline	Baseline	Public Briefing	Mandarin*English	1	ChatGPT (this session)	0.8	2026-02-04	Write a public briefing for the project 'Community Solar Microgrid Pilot' for a Mandarin*English collaboration context.	【中文（普通话）】 公众通报——社区太阳能微电网试点（20 Jan 2026） 我们在社区太阳能微电网试点方面已已完成现场勘测。目前正在处理逆变器供货周期偏长，并将共享更新后的时间表。 如有疑问，请联系项目办公室。 【English】 Public briefing – Community Solar Microgrid Pilot (20 Jan 2026) We have site survey completed for the Community Solar Microgrid Pilot. We are managing supplier lead time on inverters and will share revised timeline. For questions, contact the project office.
OUT020	Mandarin_English_PublicBriefing_Baseline	Baseline	Public Briefing	Mandarin*English	2	ChatGPT (this session)	0.8	2026-02-04	Write a public briefing for the project 'Inclusive Digital Services Upgrade' for a Mandarin*English collaboration context.	【中文（普通话）】 公众通报——包容性数字服务升级（19 Jan 2026） 我们在包容性数字服务升级方面已已完成用户旅程草案测试。目前正在处理翻译审核资源不足，并将确认审核排班。 如有疑问，请联系项目办公室。 【English】 Public briefing – Inclusive Digital Services Upgrade (19 Jan 2026) We have draft user journey tested for the Inclusive Digital Services Upgrade. We are managing translation review capacity and will confirm review roster. For questions, contact the project office.
OUT021	Mandarin_English_PublicBriefing_Baseline	Baseline	Public Briefing	Mandarin*English	3	ChatGPT (this session)	0.8	2026-02-04	Write a public briefing for the project 'Sustainable Mobility Data Dashboard' for a Mandarin*English collaboration context.	【中文（普通话）】 公众通报——可持续出行数据仪表盘（18 Jan 2026） 我们在可持续出行数据仪表盘方面已API 集成已完成。目前正在处理公开发布中的隐私表述需完善，并将准备公众 FAQ。 如有疑问，请联系项目办公室。 【English】 Public briefing – Sustainable Mobility Data Dashboard (18 Jan 2026) We have API integration finished for the Sustainable Mobility Data Dashboard. We are managing privacy wording in public release and will prepare public FAQ. For questions, contact the project office.
OUT022	Mandarin_English_PublicBriefing_CAP	CAP	Public Briefing	Mandarin*English	1	ChatGPT (this session)	0.8	2026-02-04	You are assisting a mixed Mandarin/English project team in Australia. Task: Write a public briefing about 'Community Solar Microgrid Pilot'. Output: Provide bilingual content matching the language pair Mandarin*English. Style: Professional, culturally appropriate, considerate, and face-saving where relevant; use polite softeners, clear structure, and an inclusive Australian workplace tone. Formal…	【中文（普通话）】 公众通报——社区太阳能微电网试点（20 Jan 2026） 我们承认我们工作的土地之传统守护者，并向过去与现在的长者致以敬意。 最新进展 - 团队已在社区太阳能微电网试点方面已完成现场勘测。 - 我们正与合作伙伴共同管理逆变器供货周期偏长，并将尽早对外同步任何变更，减少信息不对称。 下一步 - 我们将共享更新后的时间表，并发布一份易读的公众 FAQ。 公众参与与支持 - 如您有疑问或需要语言/格式/口译等支持，请联系项目办公室，我们将尽力协助。 【English】 Public briefing – Community Solar Microgrid Pilot (20 Jan 2026) We acknowledge the Traditional Custodians of the lands on which we work, and pay our respe…
OUT023	Mandarin_English_PublicBriefing_CAP	CAP	Public Briefing	Mandarin*English	2	ChatGPT (this session)	0.8	2026-02-04	You are assisting a mixed Mandarin/English project team in Australia. Task: Write a public briefing about 'Inclusive Digital Services Upgrade'. Output: Provide bilingual content matching the language pair Mandarin*English. Style: Professional, culturally appropriate, considerate, and face-saving where relevant; use polite softeners, clear structure, and an inclusive Australian workplace tone. For…	【中文（普通话）】 公众通报——包容性数字服务升级（19 Jan 2026） 我们承认我们工作的土地之传统守护者，并向过去与现在的长者致以敬意。 最新进展 - 团队已在包容性数字服务升级方面已完成用户旅程草案测试。 - 我们正与合作伙伴共同管理翻译审核资源不足，并将尽早对外同步任何变更，减少信息不对称。 下一步 - 我们将确认审核排班，并发布一份易读的公众 FAQ。 公众参与与支持 - 如您有疑问或需要语言/格式/口译等支持，请联系项目办公室，我们将尽力协助。 【English】 Public briefing – Inclusive Digital Services Upgrade (19 Jan 2026) We acknowledge the Traditional Custodians of the lands on which we work, and pay our resp…
OUT024	Mandarin_English_PublicBriefing_CAP	CAP	Public Briefing	Mandarin*English	3	ChatGPT (this session)	0.8	2026-02-04	You are assisting a mixed Mandarin/English project team in Australia. Task: Write a public briefing about 'Sustainable Mobility Data Dashboard'. Output: Provide bilingual content matching the language pair Mandarin*English. Style: Professional, culturally appropriate, considerate, and face-saving where relevant; use polite softeners, clear structure, and an inclusive Australian workplace tone. Fo…	【中文（普通话）】 公众通报——可持续出行数据仪表盘（18 Jan 2026） 我们承认我们工作的土地之传统守护者，并向过去与现在的长者致以敬意。 最新进展 - 团队已在可持续出行数据仪表盘方面API 集成已完成。 - 我们正与合作伙伴共同管理公开发布中的隐私表述需完善，并将尽早对外同步任何变更，减少信息不对称。 下一步 - 我们将准备公众 FAQ，并发布一份易读的公众 FAQ。 公众参与与支持 - 如您有疑问或需要语言/格式/口译等支持，请联系项目办公室，我们将尽力协助。 【English】 Public briefing – Sustainable Mobility Data Dashboard (18 Jan 2026) We acknowledge the Traditional Custodians of the lands on which we work, and pay …
OUT025	Cantonese_English_FormalEmail_Baseline	Baseline	Formal Email	Cantonese*English	1	ChatGPT (this session)	0.8	2026-02-04	Write a formal email for the project 'Community Solar Microgrid Pilot' for a Cantonese*English collaboration context.	【粵語】 主旨：項目更新：社區太陽能微電網試點（下一步） Emily Brown你好： 我哋已經已完成現場勘測。主要風險係逆變器供貨期偏長。下一步會分享更新後嘅時間表。 麻煩你睇下附件，喺8 Feb 2026前覆返。 唔該， 陳美玲 【English】 Subject: Project update – Community Solar Microgrid Pilot (next steps) Hi Emily Brown, We completed the site survey completed. The main risk is supplier lead time on inverters. Next, we will share revised timeline. Please review the attached notes and reply by 8 Feb 2026.…
OUT026	Cantonese_English_FormalEmail_Baseline	Baseline	Formal Email	Cantonese*English	2	ChatGPT (this session)	0.8	2026-02-04	Write a formal email for the project 'Inclusive Digital Services Upgrade' for a Cantonese*English collaboration context.	【粵語】 主旨：項目更新：共融數碼服務升級（下一步） Emily Brown你好： 我哋已經已完成用戶旅程草案測試。主要風險係翻譯審核資源不足。下一步會確認審核更表。 麻煩你睇下附件，喺9 Feb 2026前覆返。 唔該， 陳美玲 【English】 Subject: Project update – Inclusive Digital Services Upgrade (next steps) Hi Emily Brown, We completed the draft user journey tested. The main risk is translation review capacity. Next, we will confirm review roster. Please review the attached notes and reply by 9 Feb 2026…
OUT027	Cantonese_English_FormalEmail_Baseline	Baseline	Formal Email	Cantonese*English	3	ChatGPT (this session)	0.8	2026-02-04	Write a formal email for the project 'Sustainable Mobility Data Dashboard' for a Cantonese*English collaboration context.	【粵語】 主旨：項目更新：可持續出行數據Dashboard（下一步） Emily Brown你好： 我哋已經API 整合已完成。主要風險係公開發布嘅私隱用詞要完善。下一步會準備公眾 FAQ。 麻煩你睇下附件，喺10 Feb 2026前覆返。 唔該， 陳美玲 【English】 Subject: Project update – Sustainable Mobility Data Dashboard (next steps) Hi Emily Brown, We completed the API integration finished. The main risk is privacy wording in public release. Next, we will prepare public FAQ. Please review the attached notes and rep…
OUT028	Cantonese_English_FormalEmail_CAP	CAP	Formal Email	Cantonese*English	1	ChatGPT (this session)	0.8	2026-02-04	You are assisting a Cantonese/English stakeholder group in Australia. Task: Write a formal email about 'Community Solar Microgrid Pilot'. Output: Provide bilingual content matching the language pair Cantonese*English. Style: Professional, culturally appropriate, considerate, and face-saving where relevant; use polite softeners, clear structure, and an inclusive Australian workplace tone. Formalit…	【粵語】 主旨：項目更新：社區太陽能微電網試點（下一步） Emily Brown你好： 希望你近排都順利，亦多謝你一直支持社區太陽能微電網試點。同你簡單更新一下：我哋已經已完成現場勘測。而家需要留意嘅係逆變器供貨期偏長，我哋都喺度研究替代方案，務求減低對進度嘅影響。 如果方便，麻煩你抽少少時間睇下附件，喺8 Feb 2026前畀啲意見我哋。唔該晒！ 祝好， 陳美玲 【English】 Subject: Project update – Community Solar Microgrid Pilot (next steps) Hi Emily Brown, I hope you’re doing well. Thanks for your support on Community Solar Microgrid Pilot. A quick update: we’ve just site …
OUT029	Cantonese_English_FormalEmail_CAP	CAP	Formal Email	Cantonese*English	2	ChatGPT (this session)	0.8	2026-02-04	You are assisting a Cantonese/English stakeholder group in Australia. Task: Write a formal email about 'Inclusive Digital Services Upgrade'. Output: Provide bilingual content matching the language pair Cantonese*English. Style: Professional, culturally appropriate, considerate, and face-saving where relevant; use polite softeners, clear structure, and an inclusive Australian workplace tone. Forma…	【粵語】 主旨：項目更新：共融數碼服務升級（下一步） Emily Brown你好： 希望你近排都順利，亦多謝你一直支持共融數碼服務升級。同你簡單更新一下：我哋已經已完成用戶旅程草案測試。而家需要留意嘅係翻譯審核資源不足，我哋都喺度研究替代方案，務求減低對進度嘅影響。 如果方便，麻煩你抽少少時間睇下附件，喺9 Feb 2026前畀啲意見我哋。唔該晒！ 祝好， 陳美玲 【English】 Subject: Project update – Inclusive Digital Services Upgrade (next steps) Hi Emily Brown, I hope you’re doing well. Thanks for your support on Inclusive Digital Services Upgrade. A quick update: we’ve just…
OUT030	Cantonese_English_FormalEmail_CAP	CAP	Formal Email	Cantonese*English	3	ChatGPT (this session)	0.8	2026-02-04	You are assisting a Cantonese/English stakeholder group in Australia. Task: Write a formal email about 'Sustainable Mobility Data Dashboard'. Output: Provide bilingual content matching the language pair Cantonese*English. Style: Professional, culturally appropriate, considerate, and face-saving where relevant; use polite softeners, clear structure, and an inclusive Australian workplace tone. Form…	【粵語】 主旨：項目更新：可持續出行數據Dashboard（下一步） Emily Brown你好： 希望你近排都順利，亦多謝你一直支持可持續出行數據Dashboard。同你簡單更新一下：我哋已經API 整合已完成。而家需要留意嘅係公開發布嘅私隱用詞要完善，我哋都喺度研究替代方案，務求減低對進度嘅影響。 如果方便，麻煩你抽少少時間睇下附件，喺10 Feb 2026前畀啲意見我哋。唔該晒！ 祝好， 陳美玲 【English】 Subject: Project update – Sustainable Mobility Data Dashboard (next steps) Hi Emily Brown, I hope you’re doing well. Thanks for your support on Sustainable Mobility Data Dashboard. A qui…
OUT031	Cantonese_English_ProjectReport_Baseline	Baseline	Project Report	Cantonese*English	1	ChatGPT (this session)	0.8	2026-02-04	Write a project report for the project 'Community Solar Microgrid Pilot' for a Cantonese*English collaboration context.	【粵語】 社區太陽能微電網試點——周報（3 Feb 2026） 1）概述：已完成現場勘測。 2）交付：文件、持份者跟進。 3）風險/問題：逆變器供貨期偏長。 4）下一步：分享更新後嘅時間表。 5）需要支持：確認批核。 【English】 Community Solar Microgrid Pilot – Weekly Project Report (3 Feb 2026) 1) Summary: site survey completed. 2) Key deliverables: documentation, stakeholder check-in. 3) Risks/Issues: supplier lead time on inverters. 4) Next steps: share revised timeline. 5) Support needed: confirm ap…
OUT032	Cantonese_English_ProjectReport_Baseline	Baseline	Project Report	Cantonese*English	2	ChatGPT (this session)	0.8	2026-02-04	Write a project report for the project 'Inclusive Digital Services Upgrade' for a Cantonese*English collaboration context.	【粵語】 共融數碼服務升級——周報（2 Feb 2026） 1）概述：已完成用戶旅程草案測試。 2）交付：文件、持份者跟進。 3）風險/問題：翻譯審核資源不足。 4）下一步：確認審核更表。 5）需要支持：確認批核。 【English】 Inclusive Digital Services Upgrade – Weekly Project Report (2 Feb 2026) 1) Summary: draft user journey tested. 2) Key deliverables: documentation, stakeholder check-in. 3) Risks/Issues: translation review capacity. 4) Next steps: confirm review roster. 5) Support needed: confirm a…
OUT033	Cantonese_English_ProjectReport_Baseline	Baseline	Project Report	Cantonese*English	3	ChatGPT (this session)	0.8	2026-02-04	Write a project report for the project 'Sustainable Mobility Data Dashboard' for a Cantonese*English collaboration context.	【粵語】 可持續出行數據Dashboard——周報（1 Feb 2026） 1）概述：API 整合已完成。 2）交付：文件、持份者跟進。 3）風險/問題：公開發布嘅私隱用詞要完善。 4）下一步：準備公眾 FAQ。 5）需要支持：確認批核。 【English】 Sustainable Mobility Data Dashboard – Weekly Project Report (1 Feb 2026) 1) Summary: API integration finished. 2) Key deliverables: documentation, stakeholder check-in. 3) Risks/Issues: privacy wording in public release. 4) Next steps: prepare public FAQ. 5) Support ne…
OUT034	Cantonese_English_ProjectReport_CAP	CAP	Project Report	Cantonese*English	1	ChatGPT (this session)	0.8	2026-02-04	You are assisting a Cantonese/English stakeholder group in Australia. Task: Write a project report about 'Community Solar Microgrid Pilot'. Output: Provide bilingual content matching the language pair Cantonese*English. Style: Professional, culturally appropriate, considerate, and face-saving where relevant; use polite softeners, clear structure, and an inclusive Australian workplace tone. Formal…	【粵語】 社區太陽能微電網試點——周報（3 Feb 2026） 概述 - 進展：多謝大家配合，我哋已經已完成現場勘測。 - 影響：整體進度仍然可控，但供貨期要繼續留意。 重點 - 已完成：已完成現場勘測。 - 協作：提早同步關鍵資訊，盡量減少來回確認。 風險同應對 - 風險：逆變器供貨期偏長。 - 應對：提早對齊期望，同時準備後備方案。 本週計劃 - 分享更新後嘅時間表。 - 安排個短會，清楚分工同時間表。 需要支援 - 如果撞到澳洲本地公眾假期/團隊時間，麻煩提一提，方便我哋調整。 【English】 Community Solar Microgrid Pilot – Weekly Project Report (3 Feb 2026) Summary - Progress: We have site survey completed, thanks to the team’s coo…
OUT035	Cantonese_English_ProjectReport_CAP	CAP	Project Report	Cantonese*English	2	ChatGPT (this session)	0.8	2026-02-04	You are assisting a Cantonese/English stakeholder group in Australia. Task: Write a project report about 'Inclusive Digital Services Upgrade'. Output: Provide bilingual content matching the language pair Cantonese*English. Style: Professional, culturally appropriate, considerate, and face-saving where relevant; use polite softeners, clear structure, and an inclusive Australian workplace tone. For…	【粵語】 共融數碼服務升級——周報（2 Feb 2026） 概述 - 進展：多謝大家配合，我哋已經已完成用戶旅程草案測試。 - 影響：整體進度仍然可控，但供貨期要繼續留意。 重點 - 已完成：已完成用戶旅程草案測試。 - 協作：提早同步關鍵資訊，盡量減少來回確認。 風險同應對 - 風險：翻譯審核資源不足。 - 應對：提早對齊期望，同時準備後備方案。 本週計劃 - 確認審核更表。 - 安排個短會，清楚分工同時間表。 需要支援 - 如果撞到澳洲本地公眾假期/團隊時間，麻煩提一提，方便我哋調整。 【English】 Inclusive Digital Services Upgrade – Weekly Project Report (2 Feb 2026) Summary - Progress: We have draft user journey tested, thanks to the …
OUT036	Cantonese_English_ProjectReport_CAP	CAP	Project Report	Cantonese*English	3	ChatGPT (this session)	0.8	2026-02-04	You are assisting a Cantonese/English stakeholder group in Australia. Task: Write a project report about 'Sustainable Mobility Data Dashboard'. Output: Provide bilingual content matching the language pair Cantonese*English. Style: Professional, culturally appropriate, considerate, and face-saving where relevant; use polite softeners, clear structure, and an inclusive Australian workplace tone. Fo…	【粵語】 可持續出行數據Dashboard——周報（1 Feb 2026） 概述 - 進展：多謝大家配合，我哋已經API 整合已完成。 - 影響：整體進度仍然可控，但供貨期要繼續留意。 重點 - 已完成：API 整合已完成。 - 協作：提早同步關鍵資訊，盡量減少來回確認。 風險同應對 - 風險：公開發布嘅私隱用詞要完善。 - 應對：提早對齊期望，同時準備後備方案。 本週計劃 - 準備公眾 FAQ。 - 安排個短會，清楚分工同時間表。 需要支援 - 如果撞到澳洲本地公眾假期/團隊時間，麻煩提一提，方便我哋調整。 【English】 Sustainable Mobility Data Dashboard – Weekly Project Report (1 Feb 2026) Summary - Progress: We have API integration finished, than…
OUT037	Cantonese_English_MeetingMinutes_Baseline	Baseline	Meeting Minutes	Cantonese*English	1	ChatGPT (this session)	0.8	2026-02-04	Write a meeting minutes for the project 'Community Solar Microgrid Pilot' for a Cantonese*English collaboration context.	【粵語】 社區太陽能微電網試點 會議紀錄（27 Jan 2026） 時間：10:00–11:00 AEDT 出席：Emily Brown、李偉、陳美玲 議程：進度、風險、下一步。 重點： - 已完成現場勘測。 - 風險：逆變器供貨期偏長。 行動項： 1）分享更新後嘅時間表（負責人：李偉） 2）確認批核（負責人：Emily） 【English】 Meeting Minutes – Community Solar Microgrid Pilot (27 Jan 2026) Time: 10:00–11:00 AEDT Attendees: Emily Brown, Li Wei, Mei-ling Chan Agenda - Status update - Risks - Next steps Notes - Site survey completed. - Risk: supplier l…
OUT038	Cantonese_English_MeetingMinutes_Baseline	Baseline	Meeting Minutes	Cantonese*English	2	ChatGPT (this session)	0.8	2026-02-04	Write a meeting minutes for the project 'Inclusive Digital Services Upgrade' for a Cantonese*English collaboration context.	【粵語】 共融數碼服務升級 會議紀錄（26 Jan 2026） 時間：11:00–12:00 AEDT 出席：Emily Brown、李偉、陳美玲 議程：進度、風險、下一步。 重點： - 已完成用戶旅程草案測試。 - 風險：翻譯審核資源不足。 行動項： 1）確認審核更表（負責人：李偉） 2）確認批核（負責人：Emily） 【English】 Meeting Minutes – Inclusive Digital Services Upgrade (26 Jan 2026) Time: 11:00–12:00 AEDT Attendees: Emily Brown, Li Wei, Mei-ling Chan Agenda - Status update - Risks - Next steps Notes - Draft user journey tested. - Risk: tran…
OUT039	Cantonese_English_MeetingMinutes_Baseline	Baseline	Meeting Minutes	Cantonese*English	3	ChatGPT (this session)	0.8	2026-02-04	Write a meeting minutes for the project 'Sustainable Mobility Data Dashboard' for a Cantonese*English collaboration context.	【粵語】 可持續出行數據Dashboard 會議紀錄（25 Jan 2026） 時間：12:00–13:00 AEDT 出席：Emily Brown、李偉、陳美玲 議程：進度、風險、下一步。 重點： - API 整合已完成。 - 風險：公開發布嘅私隱用詞要完善。 行動項： 1）準備公眾 FAQ（負責人：李偉） 2）確認批核（負責人：Emily） 【English】 Meeting Minutes – Sustainable Mobility Data Dashboard (25 Jan 2026) Time: 12:00–13:00 AEDT Attendees: Emily Brown, Li Wei, Mei-ling Chan Agenda - Status update - Risks - Next steps Notes - Api integration finished. …
OUT040	Cantonese_English_MeetingMinutes_CAP	CAP	Meeting Minutes	Cantonese*English	1	ChatGPT (this session)	0.8	2026-02-04	You are assisting a Cantonese/English stakeholder group in Australia. Task: Write a meeting minutes about 'Community Solar Microgrid Pilot'. Output: Provide bilingual content matching the language pair Cantonese*English. Style: Professional, culturally appropriate, considerate, and face-saving where relevant; use polite softeners, clear structure, and an inclusive Australian workplace tone. Forma…	【粵語】 社區太陽能微電網試點 會議紀錄（27 Jan 2026） 時間：10:00–11:00 AEDT 出席：Emily Brown、李偉、陳美玲 開場 - 做咗個簡短對齊，確保大家跨語言理解一致。 進度更新 - 進展：我哋已經已完成現場勘測。 - 對齊：將關鍵決定再講一次，畀大家有空間提出顧慮，避免尷尬同誤會。 風險同討論 - 風險：逆變器供貨期偏長。 - 應對：盡量提早通知變更，減少突發同資訊落差。 決定 - 繼續按現有計劃推進，同時準備後備方案。 行動項 1）分享更新後嘅時間表（負責人：李偉） 2）會後發一份短書面摘要，方便非母語同事跟進（負責人：Emily） 3）確認批核同時間表（負責人：陳美玲） 【English】 Meeting Minutes – Community Solar Microgrid Pilot (27 Jan 2026) Time: 10:00–11:0…
OUT041	Cantonese_English_MeetingMinutes_CAP	CAP	Meeting Minutes	Cantonese*English	2	ChatGPT (this session)	0.8	2026-02-04	You are assisting a Cantonese/English stakeholder group in Australia. Task: Write a meeting minutes about 'Inclusive Digital Services Upgrade'. Output: Provide bilingual content matching the language pair Cantonese*English. Style: Professional, culturally appropriate, considerate, and face-saving where relevant; use polite softeners, clear structure, and an inclusive Australian workplace tone. Fo…	【粵語】 共融數碼服務升級 會議紀錄（26 Jan 2026） 時間：11:00–12:00 AEDT 出席：Emily Brown、李偉、陳美玲 開場 - 做咗個簡短對齊，確保大家跨語言理解一致。 進度更新 - 進展：我哋已經已完成用戶旅程草案測試。 - 對齊：將關鍵決定再講一次，畀大家有空間提出顧慮，避免尷尬同誤會。 風險同討論 - 風險：翻譯審核資源不足。 - 應對：盡量提早通知變更，減少突發同資訊落差。 決定 - 繼續按現有計劃推進，同時準備後備方案。 行動項 1）確認審核更表（負責人：李偉） 2）會後發一份短書面摘要，方便非母語同事跟進（負責人：Emily） 3）確認批核同時間表（負責人：陳美玲） 【English】 Meeting Minutes – Inclusive Digital Services Upgrade (26 Jan 2026) Time: 11:00–12…
OUT042	Cantonese_English_MeetingMinutes_CAP	CAP	Meeting Minutes	Cantonese*English	3	ChatGPT (this session)	0.8	2026-02-04	You are assisting a Cantonese/English stakeholder group in Australia. Task: Write a meeting minutes about 'Sustainable Mobility Data Dashboard'. Output: Provide bilingual content matching the language pair Cantonese*English. Style: Professional, culturally appropriate, considerate, and face-saving where relevant; use polite softeners, clear structure, and an inclusive Australian workplace tone. F…	【粵語】 可持續出行數據Dashboard 會議紀錄（25 Jan 2026） 時間：12:00–13:00 AEDT 出席：Emily Brown、李偉、陳美玲 開場 - 做咗個簡短對齊，確保大家跨語言理解一致。 進度更新 - 進展：我哋已經API 整合已完成。 - 對齊：將關鍵決定再講一次，畀大家有空間提出顧慮，避免尷尬同誤會。 風險同討論 - 風險：公開發布嘅私隱用詞要完善。 - 應對：盡量提早通知變更，減少突發同資訊落差。 決定 - 繼續按現有計劃推進，同時準備後備方案。 行動項 1）準備公眾 FAQ（負責人：李偉） 2）會後發一份短書面摘要，方便非母語同事跟進（負責人：Emily） 3）確認批核同時間表（負責人：陳美玲） 【English】 Meeting Minutes – Sustainable Mobility Data Dashboard (25 Jan 2026) T…
OUT043	Cantonese_English_PublicBriefing_Baseline	Baseline	Public Briefing	Cantonese*English	1	ChatGPT (this session)	0.8	2026-02-04	Write a public briefing for the project 'Community Solar Microgrid Pilot' for a Cantonese*English collaboration context.	【粵語】 公眾簡報——社區太陽能微電網試點（20 Jan 2026） 我哋喺社區太陽能微電網試點方面已經已完成現場勘測。而家處理緊逆變器供貨期偏長，之後會分享更新後嘅時間表。 如有問題，請聯絡項目辦公室。 【English】 Public briefing – Community Solar Microgrid Pilot (20 Jan 2026) We have site survey completed for the Community Solar Microgrid Pilot. We are managing supplier lead time on inverters and will share revised timeline. For questions, contact the project office.
OUT044	Cantonese_English_PublicBriefing_Baseline	Baseline	Public Briefing	Cantonese*English	2	ChatGPT (this session)	0.8	2026-02-04	Write a public briefing for the project 'Inclusive Digital Services Upgrade' for a Cantonese*English collaboration context.	【粵語】 公眾簡報——共融數碼服務升級（19 Jan 2026） 我哋喺共融數碼服務升級方面已經已完成用戶旅程草案測試。而家處理緊翻譯審核資源不足，之後會確認審核更表。 如有問題，請聯絡項目辦公室。 【English】 Public briefing – Inclusive Digital Services Upgrade (19 Jan 2026) We have draft user journey tested for the Inclusive Digital Services Upgrade. We are managing translation review capacity and will confirm review roster. For questions, contact the project office.
OUT045	Cantonese_English_PublicBriefing_Baseline	Baseline	Public Briefing	Cantonese*English	3	ChatGPT (this session)	0.8	2026-02-04	Write a public briefing for the project 'Sustainable Mobility Data Dashboard' for a Cantonese*English collaboration context.	【粵語】 公眾簡報——可持續出行數據Dashboard（18 Jan 2026） 我哋喺可持續出行數據Dashboard方面已經API 整合已完成。而家處理緊公開發布嘅私隱用詞要完善，之後會準備公眾 FAQ。 如有問題，請聯絡項目辦公室。 【English】 Public briefing – Sustainable Mobility Data Dashboard (18 Jan 2026) We have API integration finished for the Sustainable Mobility Data Dashboard. We are managing privacy wording in public release and will prepare public FAQ. For questions, contact the project office.
OUT046	Cantonese_English_PublicBriefing_CAP	CAP	Public Briefing	Cantonese*English	1	ChatGPT (this session)	0.8	2026-02-04	You are assisting a Cantonese/English stakeholder group in Australia. Task: Write a public briefing about 'Community Solar Microgrid Pilot'. Output: Provide bilingual content matching the language pair Cantonese*English. Style: Professional, culturally appropriate, considerate, and face-saving where relevant; use polite softeners, clear structure, and an inclusive Australian workplace tone. Forma…	【粵語】 公眾簡報——社區太陽能微電網試點（20 Jan 2026） 我哋承認我哋工作嘅土地之傳統守護者，並向過去同而家嘅長者致敬。 最新進展 - 團隊已經喺社區太陽能微電網試點方面已完成現場勘測。 - 我哋正同合作夥伴一齊處理逆變器供貨期偏長，並會盡早公開任何改動，減少資訊落差。 下一步 - 我哋會分享更新後嘅時間表，同時發一份易明嘅公眾 FAQ。 點樣參與同獲得支援 - 如你有問題，或者需要語言/格式/口譯支援，請聯絡項目辦公室，我哋會盡力協助。 【English】 Public briefing – Community Solar Microgrid Pilot (20 Jan 2026) We acknowledge the Traditional Custodians of the lands on which we work, and pay our respects to …
OUT047	Cantonese_English_PublicBriefing_CAP	CAP	Public Briefing	Cantonese*English	2	ChatGPT (this session)	0.8	2026-02-04	You are assisting a Cantonese/English stakeholder group in Australia. Task: Write a public briefing about 'Inclusive Digital Services Upgrade'. Output: Provide bilingual content matching the language pair Cantonese*English. Style: Professional, culturally appropriate, considerate, and face-saving where relevant; use polite softeners, clear structure, and an inclusive Australian workplace tone. Fo…	【粵語】 公眾簡報——共融數碼服務升級（19 Jan 2026） 我哋承認我哋工作嘅土地之傳統守護者，並向過去同而家嘅長者致敬。 最新進展 - 團隊已經喺共融數碼服務升級方面已完成用戶旅程草案測試。 - 我哋正同合作夥伴一齊處理翻譯審核資源不足，並會盡早公開任何改動，減少資訊落差。 下一步 - 我哋會確認審核更表，同時發一份易明嘅公眾 FAQ。 點樣參與同獲得支援 - 如你有問題，或者需要語言/格式/口譯支援，請聯絡項目辦公室，我哋會盡力協助。 【English】 Public briefing – Inclusive Digital Services Upgrade (19 Jan 2026) We acknowledge the Traditional Custodians of the lands on which we work, and pay our respects to …
OUT048	Cantonese_English_PublicBriefing_CAP	CAP	Public Briefing	Cantonese*English	3	ChatGPT (this session)	0.8	2026-02-04	You are assisting a Cantonese/English stakeholder group in Australia. Task: Write a public briefing about 'Sustainable Mobility Data Dashboard'. Output: Provide bilingual content matching the language pair Cantonese*English. Style: Professional, culturally appropriate, considerate, and face-saving where relevant; use polite softeners, clear structure, and an inclusive Australian workplace tone. F…	【粵語】 公眾簡報——可持續出行數據Dashboard（18 Jan 2026） 我哋承認我哋工作嘅土地之傳統守護者，並向過去同而家嘅長者致敬。 最新進展 - 團隊已經喺可持續出行數據Dashboard方面API 整合已完成。 - 我哋正同合作夥伴一齊處理公開發布嘅私隱用詞要完善，並會盡早公開任何改動，減少資訊落差。 下一步 - 我哋會準備公眾 FAQ，同時發一份易明嘅公眾 FAQ。 點樣參與同獲得支援 - 如你有問題，或者需要語言/格式/口譯支援，請聯絡項目辦公室，我哋會盡力協助。 【English】 Public briefing – Sustainable Mobility Data Dashboard (18 Jan 2026) We acknowledge the Traditional Custodians of the lands on which we work, and…
OUT049	Mandarin_Cantonese_FormalEmail_Baseline	Baseline	Formal Email	Mandarin*Cantonese	1	ChatGPT (this session)	0.8	2026-02-04	Write a formal email for the project 'Community Solar Microgrid Pilot' for a Mandarin*Cantonese collaboration context.	【中文（普通话）】 主题：项目更新：社区太阳能微电网试点（下一步） 陳美玲你好： 我们已已完成现场勘测。主要风险是逆变器供货周期偏长。下一步我们将共享更新后的时间表。 请查看附件并在8 Feb 2026前回复。 谢谢， 李伟 【粵語】 主旨：項目更新：社區太陽能微電網試點（下一步） 陳美玲你好： 我哋已經已完成現場勘測。主要風險係逆變器供貨期偏長。下一步會分享更新後嘅時間表。 麻煩你睇下附件，喺8 Feb 2026前覆返。 唔該， 李伟
OUT050	Mandarin_Cantonese_FormalEmail_Baseline	Baseline	Formal Email	Mandarin*Cantonese	2	ChatGPT (this session)	0.8	2026-02-04	Write a formal email for the project 'Inclusive Digital Services Upgrade' for a Mandarin*Cantonese collaboration context.	【中文（普通话）】 主题：项目更新：包容性数字服务升级（下一步） 陳美玲你好： 我们已已完成用户旅程草案测试。主要风险是翻译审核资源不足。下一步我们将确认审核排班。 请查看附件并在9 Feb 2026前回复。 谢谢， 李伟 【粵語】 主旨：項目更新：共融數碼服務升級（下一步） 陳美玲你好： 我哋已經已完成用戶旅程草案測試。主要風險係翻譯審核資源不足。下一步會確認審核更表。 麻煩你睇下附件，喺9 Feb 2026前覆返。 唔該， 李伟
OUT051	Mandarin_Cantonese_FormalEmail_Baseline	Baseline	Formal Email	Mandarin*Cantonese	3	ChatGPT (this session)	0.8	2026-02-04	Write a formal email for the project 'Sustainable Mobility Data Dashboard' for a Mandarin*Cantonese collaboration context.	【中文（普通话）】 主题：项目更新：可持续出行数据仪表盘（下一步） 陳美玲你好： 我们已API 集成已完成。主要风险是公开发布中的隐私表述需完善。下一步我们将准备公众 FAQ。 请查看附件并在10 Feb 2026前回复。 谢谢， 李伟 【粵語】 主旨：項目更新：可持續出行數據Dashboard（下一步） 陳美玲你好： 我哋已經API 整合已完成。主要風險係公開發布嘅私隱用詞要完善。下一步會準備公眾 FAQ。 麻煩你睇下附件，喺10 Feb 2026前覆返。 唔該， 李伟
OUT052	Mandarin_Cantonese_FormalEmail_CAP	CAP	Formal Email	Mandarin*Cantonese	1	ChatGPT (this session)	0.8	2026-02-04	You are assisting a Mandarin/Cantonese internal working group in Australia. Task: Write a formal email about 'Community Solar Microgrid Pilot'. Output: Provide bilingual content matching the language pair Mandarin*Cantonese. Style: Professional, culturally appropriate, considerate, and face-saving where relevant; use polite softeners, clear structure, and an inclusive Australian workplace tone. F…	【中文（普通话）】 主题：项目更新：社区太阳能微电网试点（下一步） 陳美玲您好： 希望您一切顺利，也感谢您一直以来对社区太阳能微电网试点的支持。简单向您汇报一下进展：我们已已完成现场勘测。目前需要留意的一点是逆变器供货周期偏长，我们也在同步评估替代方案以尽量减少影响。 如您方便，烦请您抽空查看附件并在8 Feb 2026前提出建议或意见。非常感谢！ 此致 敬礼 李伟 【粵語】 主旨：項目更新：社區太陽能微電網試點（下一步） 陳美玲你好： 希望你近排都順利，亦多謝你一直支持社區太陽能微電網試點。同你簡單更新一下：我哋已經已完成現場勘測。而家需要留意嘅係逆變器供貨期偏長，我哋都喺度研究替代方案，務求減低對進度嘅影響。 如果方便，麻煩你抽少少時間睇下附件，喺8 Feb 2026前畀啲意見我哋。唔該晒！ 祝好， 李伟
OUT053	Mandarin_Cantonese_FormalEmail_CAP	CAP	Formal Email	Mandarin*Cantonese	2	ChatGPT (this session)	0.8	2026-02-04	You are assisting a Mandarin/Cantonese internal working group in Australia. Task: Write a formal email about 'Inclusive Digital Services Upgrade'. Output: Provide bilingual content matching the language pair Mandarin*Cantonese. Style: Professional, culturally appropriate, considerate, and face-saving where relevant; use polite softeners, clear structure, and an inclusive Australian workplace tone…	【中文（普通话）】 主题：项目更新：包容性数字服务升级（下一步） 陳美玲您好： 希望您一切顺利，也感谢您一直以来对包容性数字服务升级的支持。简单向您汇报一下进展：我们已已完成用户旅程草案测试。目前需要留意的一点是翻译审核资源不足，我们也在同步评估替代方案以尽量减少影响。 如您方便，烦请您抽空查看附件并在9 Feb 2026前提出建议或意见。非常感谢！ 此致 敬礼 李伟 【粵語】 主旨：項目更新：共融數碼服務升級（下一步） 陳美玲你好： 希望你近排都順利，亦多謝你一直支持共融數碼服務升級。同你簡單更新一下：我哋已經已完成用戶旅程草案測試。而家需要留意嘅係翻譯審核資源不足，我哋都喺度研究替代方案，務求減低對進度嘅影響。 如果方便，麻煩你抽少少時間睇下附件，喺9 Feb 2026前畀啲意見我哋。唔該晒！ 祝好， 李伟
OUT054	Mandarin_Cantonese_FormalEmail_CAP	CAP	Formal Email	Mandarin*Cantonese	3	ChatGPT (this session)	0.8	2026-02-04	You are assisting a Mandarin/Cantonese internal working group in Australia. Task: Write a formal email about 'Sustainable Mobility Data Dashboard'. Output: Provide bilingual content matching the language pair Mandarin*Cantonese. Style: Professional, culturally appropriate, considerate, and face-saving where relevant; use polite softeners, clear structure, and an inclusive Australian workplace ton…	【中文（普通话）】 主题：项目更新：可持续出行数据仪表盘（下一步） 陳美玲您好： 希望您一切顺利，也感谢您一直以来对可持续出行数据仪表盘的支持。简单向您汇报一下进展：我们已API 集成已完成。目前需要留意的一点是公开发布中的隐私表述需完善，我们也在同步评估替代方案以尽量减少影响。 如您方便，烦请您抽空查看附件并在10 Feb 2026前提出建议或意见。非常感谢！ 此致 敬礼 李伟 【粵語】 主旨：項目更新：可持續出行數據Dashboard（下一步） 陳美玲你好： 希望你近排都順利，亦多謝你一直支持可持續出行數據Dashboard。同你簡單更新一下：我哋已經API 整合已完成。而家需要留意嘅係公開發布嘅私隱用詞要完善，我哋都喺度研究替代方案，務求減低對進度嘅影響。 如果方便，麻煩你抽少少時間睇下附件，喺10 Feb 2026前畀啲意見我哋。唔該晒！ 祝好， 李伟
OUT055	Mandarin_Cantonese_ProjectReport_Baseline	Baseline	Project Report	Mandarin*Cantonese	1	ChatGPT (this session)	0.8	2026-02-04	Write a project report for the project 'Community Solar Microgrid Pilot' for a Mandarin*Cantonese collaboration context.	【中文（普通话）】 社区太阳能微电网试点——周报（3 Feb 2026） 1）概述：已完成现场勘测。 2）关键交付：文档、利益相关方沟通。 3）风险/问题：逆变器供货周期偏长。 4）下一步：共享更新后的时间表。 5）需要支持：确认审批。 【粵語】 社區太陽能微電網試點——周報（3 Feb 2026） 1）概述：已完成現場勘測。 2）交付：文件、持份者跟進。 3）風險/問題：逆變器供貨期偏長。 4）下一步：分享更新後嘅時間表。 5）需要支持：確認批核。
OUT056	Mandarin_Cantonese_ProjectReport_Baseline	Baseline	Project Report	Mandarin*Cantonese	2	ChatGPT (this session)	0.8	2026-02-04	Write a project report for the project 'Inclusive Digital Services Upgrade' for a Mandarin*Cantonese collaboration context.	【中文（普通话）】 包容性数字服务升级——周报（2 Feb 2026） 1）概述：已完成用户旅程草案测试。 2）关键交付：文档、利益相关方沟通。 3）风险/问题：翻译审核资源不足。 4）下一步：确认审核排班。 5）需要支持：确认审批。 【粵語】 共融數碼服務升級——周報（2 Feb 2026） 1）概述：已完成用戶旅程草案測試。 2）交付：文件、持份者跟進。 3）風險/問題：翻譯審核資源不足。 4）下一步：確認審核更表。 5）需要支持：確認批核。
OUT057	Mandarin_Cantonese_ProjectReport_Baseline	Baseline	Project Report	Mandarin*Cantonese	3	ChatGPT (this session)	0.8	2026-02-04	Write a project report for the project 'Sustainable Mobility Data Dashboard' for a Mandarin*Cantonese collaboration context.	【中文（普通话）】 可持续出行数据仪表盘——周报（1 Feb 2026） 1）概述：API 集成已完成。 2）关键交付：文档、利益相关方沟通。 3）风险/问题：公开发布中的隐私表述需完善。 4）下一步：准备公众 FAQ。 5）需要支持：确认审批。 【粵語】 可持續出行數據Dashboard——周報（1 Feb 2026） 1）概述：API 整合已完成。 2）交付：文件、持份者跟進。 3）風險/問題：公開發布嘅私隱用詞要完善。 4）下一步：準備公眾 FAQ。 5）需要支持：確認批核。
OUT058	Mandarin_Cantonese_ProjectReport_CAP	CAP	Project Report	Mandarin*Cantonese	1	ChatGPT (this session)	0.8	2026-02-04	You are assisting a Mandarin/Cantonese internal working group in Australia. Task: Write a project report about 'Community Solar Microgrid Pilot'. Output: Provide bilingual content matching the language pair Mandarin*Cantonese. Style: Professional, culturally appropriate, considerate, and face-saving where relevant; use polite softeners, clear structure, and an inclusive Australian workplace tone.…	【中文（普通话）】 社区太阳能微电网试点——周报（3 Feb 2026） 概述 - 进展：在团队协作下，我们已已完成现场勘测。 - 影响：整体节奏可控，但仍需关注供应周期。 亮点 - 已完成：已完成现场勘测。 - 协作方式：提前同步关键信息，减少反复确认带来的沟通成本。 风险与应对 - 风险：逆变器供货周期偏长。 - 应对：提前对齐预期，并准备备选方案以降低影响。 本周计划 - 共享更新后的时间表。 - 组织一次简短对齐会，明确分工与时间点。 需要支持 - 如涉及当地公共假期/团队时间安排冲突，烦请提醒我们以便调整。 【粵語】 社區太陽能微電網試點——周報（3 Feb 2026） 概述 - 進展：多謝大家配合，我哋已經已完成現場勘測。 - 影響：整體進度仍然可控，但供貨期要繼續留意。 重點 - 已完成：已完成現場勘測。 - 協作：提早同步關鍵資訊，盡量減少來回確認。 風險同應對 - 風險…
OUT059	Mandarin_Cantonese_ProjectReport_CAP	CAP	Project Report	Mandarin*Cantonese	2	ChatGPT (this session)	0.8	2026-02-04	You are assisting a Mandarin/Cantonese internal working group in Australia. Task: Write a project report about 'Inclusive Digital Services Upgrade'. Output: Provide bilingual content matching the language pair Mandarin*Cantonese. Style: Professional, culturally appropriate, considerate, and face-saving where relevant; use polite softeners, clear structure, and an inclusive Australian workplace to…	【中文（普通话）】 包容性数字服务升级——周报（2 Feb 2026） 概述 - 进展：在团队协作下，我们已已完成用户旅程草案测试。 - 影响：整体节奏可控，但仍需关注供应周期。 亮点 - 已完成：已完成用户旅程草案测试。 - 协作方式：提前同步关键信息，减少反复确认带来的沟通成本。 风险与应对 - 风险：翻译审核资源不足。 - 应对：提前对齐预期，并准备备选方案以降低影响。 本周计划 - 确认审核排班。 - 组织一次简短对齐会，明确分工与时间点。 需要支持 - 如涉及当地公共假期/团队时间安排冲突，烦请提醒我们以便调整。 【粵語】 共融數碼服務升級——周報（2 Feb 2026） 概述 - 進展：多謝大家配合，我哋已經已完成用戶旅程草案測試。 - 影響：整體進度仍然可控，但供貨期要繼續留意。 重點 - 已完成：已完成用戶旅程草案測試。 - 協作：提早同步關鍵資訊，盡量減少來回確認。 風…
OUT060	Mandarin_Cantonese_ProjectReport_CAP	CAP	Project Report	Mandarin*Cantonese	3	ChatGPT (this session)	0.8	2026-02-04	You are assisting a Mandarin/Cantonese internal working group in Australia. Task: Write a project report about 'Sustainable Mobility Data Dashboard'. Output: Provide bilingual content matching the language pair Mandarin*Cantonese. Style: Professional, culturally appropriate, considerate, and face-saving where relevant; use polite softeners, clear structure, and an inclusive Australian workplace t…	【中文（普通话）】 可持续出行数据仪表盘——周报（1 Feb 2026） 概述 - 进展：在团队协作下，我们已API 集成已完成。 - 影响：整体节奏可控，但仍需关注供应周期。 亮点 - 已完成：API 集成已完成。 - 协作方式：提前同步关键信息，减少反复确认带来的沟通成本。 风险与应对 - 风险：公开发布中的隐私表述需完善。 - 应对：提前对齐预期，并准备备选方案以降低影响。 本周计划 - 准备公众 FAQ。 - 组织一次简短对齐会，明确分工与时间点。 需要支持 - 如涉及当地公共假期/团队时间安排冲突，烦请提醒我们以便调整。 【粵語】 可持續出行數據Dashboard——周報（1 Feb 2026） 概述 - 進展：多謝大家配合，我哋已經API 整合已完成。 - 影響：整體進度仍然可控，但供貨期要繼續留意。 重點 - 已完成：API 整合已完成。 - 協作：提早同步關鍵資訊，盡量減…
OUT061	Mandarin_Cantonese_MeetingMinutes_Baseline	Baseline	Meeting Minutes	Mandarin*Cantonese	1	ChatGPT (this session)	0.8	2026-02-04	Write a meeting minutes for the project 'Community Solar Microgrid Pilot' for a Mandarin*Cantonese collaboration context.	【中文（普通话）】 社区太阳能微电网试点 会议纪要（27 Jan 2026） 时间：10:00–11:00 AEDT 参会人员：Emily Brown、李伟、陈美玲 议程：进展、风险、下一步。 要点： - 已完成现场勘测。 - 风险：逆变器供货周期偏长。 行动项： 1）共享更新后的时间表（负责人：李伟） 2）确认审批（负责人：Emily） 【粵語】 社區太陽能微電網試點 會議紀錄（27 Jan 2026） 時間：10:00–11:00 AEDT 出席：Emily Brown、李偉、陳美玲 議程：進度、風險、下一步。 重點： - 已完成現場勘測。 - 風險：逆變器供貨期偏長。 行動項： 1）分享更新後嘅時間表（負責人：李偉） 2）確認批核（負責人：Emily）
OUT062	Mandarin_Cantonese_MeetingMinutes_Baseline	Baseline	Meeting Minutes	Mandarin*Cantonese	2	ChatGPT (this session)	0.8	2026-02-04	Write a meeting minutes for the project 'Inclusive Digital Services Upgrade' for a Mandarin*Cantonese collaboration context.	【中文（普通话）】 包容性数字服务升级 会议纪要（26 Jan 2026） 时间：11:00–12:00 AEDT 参会人员：Emily Brown、李伟、陈美玲 议程：进展、风险、下一步。 要点： - 已完成用户旅程草案测试。 - 风险：翻译审核资源不足。 行动项： 1）确认审核排班（负责人：李伟） 2）确认审批（负责人：Emily） 【粵語】 共融數碼服務升級 會議紀錄（26 Jan 2026） 時間：11:00–12:00 AEDT 出席：Emily Brown、李偉、陳美玲 議程：進度、風險、下一步。 重點： - 已完成用戶旅程草案測試。 - 風險：翻譯審核資源不足。 行動項： 1）確認審核更表（負責人：李偉） 2）確認批核（負責人：Emily）
OUT063	Mandarin_Cantonese_MeetingMinutes_Baseline	Baseline	Meeting Minutes	Mandarin*Cantonese	3	ChatGPT (this session)	0.8	2026-02-04	Write a meeting minutes for the project 'Sustainable Mobility Data Dashboard' for a Mandarin*Cantonese collaboration context.	【中文（普通话）】 可持续出行数据仪表盘 会议纪要（25 Jan 2026） 时间：12:00–13:00 AEDT 参会人员：Emily Brown、李伟、陈美玲 议程：进展、风险、下一步。 要点： - API 集成已完成。 - 风险：公开发布中的隐私表述需完善。 行动项： 1）准备公众 FAQ（负责人：李伟） 2）确认审批（负责人：Emily） 【粵語】 可持續出行數據Dashboard 會議紀錄（25 Jan 2026） 時間：12:00–13:00 AEDT 出席：Emily Brown、李偉、陳美玲 議程：進度、風險、下一步。 重點： - API 整合已完成。 - 風險：公開發布嘅私隱用詞要完善。 行動項： 1）準備公眾 FAQ（負責人：李偉） 2）確認批核（負責人：Emily）
OUT064	Mandarin_Cantonese_MeetingMinutes_CAP	CAP	Meeting Minutes	Mandarin*Cantonese	1	ChatGPT (this session)	0.8	2026-02-04	You are assisting a Mandarin/Cantonese internal working group in Australia. Task: Write a meeting minutes about 'Community Solar Microgrid Pilot'. Output: Provide bilingual content matching the language pair Mandarin*Cantonese. Style: Professional, culturally appropriate, considerate, and face-saving where relevant; use polite softeners, clear structure, and an inclusive Australian workplace tone…	【中文（普通话）】 社区太阳能微电网试点 会议纪要（27 Jan 2026） 时间：10:00–11:00 AEDT 参会人员：Emily Brown、李伟、陈美玲 开场 - 进行简短互相确认，确保跨语言理解一致。 进展更新 - 当前进展：我们已已完成现场勘测。 - 对齐方式：对关键决定进行了复述确认，便于各方表达疑虑并达成共识。 风险与讨论 - 已识别风险：逆变器供货周期偏长。 - 应对：提前沟通变更，避免信息不对称造成误解。 决定 - 在保持现计划推进的同时准备备选方案。 行动项 1）共享更新后的时间表（负责人：李伟） 2）会后发送简短书面回顾，便于非母语同事跟进（负责人：Emily） 3）确认审批与时间点（负责人：陈美玲） 【粵語】 社區太陽能微電網試點 會議紀錄（27 Jan 2026） 時間：10:00–11:00 AEDT 出席：Emily Brown、李偉、陳美玲 開場 -…
OUT065	Mandarin_Cantonese_MeetingMinutes_CAP	CAP	Meeting Minutes	Mandarin*Cantonese	2	ChatGPT (this session)	0.8	2026-02-04	You are assisting a Mandarin/Cantonese internal working group in Australia. Task: Write a meeting minutes about 'Inclusive Digital Services Upgrade'. Output: Provide bilingual content matching the language pair Mandarin*Cantonese. Style: Professional, culturally appropriate, considerate, and face-saving where relevant; use polite softeners, clear structure, and an inclusive Australian workplace t…	【中文（普通话）】 包容性数字服务升级 会议纪要（26 Jan 2026） 时间：11:00–12:00 AEDT 参会人员：Emily Brown、李伟、陈美玲 开场 - 进行简短互相确认，确保跨语言理解一致。 进展更新 - 当前进展：我们已已完成用户旅程草案测试。 - 对齐方式：对关键决定进行了复述确认，便于各方表达疑虑并达成共识。 风险与讨论 - 已识别风险：翻译审核资源不足。 - 应对：提前沟通变更，避免信息不对称造成误解。 决定 - 在保持现计划推进的同时准备备选方案。 行动项 1）确认审核排班（负责人：李伟） 2）会后发送简短书面回顾，便于非母语同事跟进（负责人：Emily） 3）确认审批与时间点（负责人：陈美玲） 【粵語】 共融數碼服務升級 會議紀錄（26 Jan 2026） 時間：11:00–12:00 AEDT 出席：Emily Brown、李偉、陳美玲 開場 - 做咗…
OUT066	Mandarin_Cantonese_MeetingMinutes_CAP	CAP	Meeting Minutes	Mandarin*Cantonese	3	ChatGPT (this session)	0.8	2026-02-04	You are assisting a Mandarin/Cantonese internal working group in Australia. Task: Write a meeting minutes about 'Sustainable Mobility Data Dashboard'. Output: Provide bilingual content matching the language pair Mandarin*Cantonese. Style: Professional, culturally appropriate, considerate, and face-saving where relevant; use polite softeners, clear structure, and an inclusive Australian workplace …	【中文（普通话）】 可持续出行数据仪表盘 会议纪要（25 Jan 2026） 时间：12:00–13:00 AEDT 参会人员：Emily Brown、李伟、陈美玲 开场 - 进行简短互相确认，确保跨语言理解一致。 进展更新 - 当前进展：我们已API 集成已完成。 - 对齐方式：对关键决定进行了复述确认，便于各方表达疑虑并达成共识。 风险与讨论 - 已识别风险：公开发布中的隐私表述需完善。 - 应对：提前沟通变更，避免信息不对称造成误解。 决定 - 在保持现计划推进的同时准备备选方案。 行动项 1）准备公众 FAQ（负责人：李伟） 2）会后发送简短书面回顾，便于非母语同事跟进（负责人：Emily） 3）确认审批与时间点（负责人：陈美玲） 【粵語】 可持續出行數據Dashboard 會議紀錄（25 Jan 2026） 時間：12:00–13:00 AEDT 出席：Emily Brown、…
OUT067	Mandarin_Cantonese_PublicBriefing_Baseline	Baseline	Public Briefing	Mandarin*Cantonese	1	ChatGPT (this session)	0.8	2026-02-04	Write a public briefing for the project 'Community Solar Microgrid Pilot' for a Mandarin*Cantonese collaboration context.	【中文（普通话）】 公众通报——社区太阳能微电网试点（20 Jan 2026） 我们在社区太阳能微电网试点方面已已完成现场勘测。目前正在处理逆变器供货周期偏长，并将共享更新后的时间表。 如有疑问，请联系项目办公室。 【粵語】 公眾簡報——社區太陽能微電網試點（20 Jan 2026） 我哋喺社區太陽能微電網試點方面已經已完成現場勘測。而家處理緊逆變器供貨期偏長，之後會分享更新後嘅時間表。 如有問題，請聯絡項目辦公室。
OUT068	Mandarin_Cantonese_PublicBriefing_Baseline	Baseline	Public Briefing	Mandarin*Cantonese	2	ChatGPT (this session)	0.8	2026-02-04	Write a public briefing for the project 'Inclusive Digital Services Upgrade' for a Mandarin*Cantonese collaboration context.	【中文（普通话）】 公众通报——包容性数字服务升级（19 Jan 2026） 我们在包容性数字服务升级方面已已完成用户旅程草案测试。目前正在处理翻译审核资源不足，并将确认审核排班。 如有疑问，请联系项目办公室。 【粵語】 公眾簡報——共融數碼服務升級（19 Jan 2026） 我哋喺共融數碼服務升級方面已經已完成用戶旅程草案測試。而家處理緊翻譯審核資源不足，之後會確認審核更表。 如有問題，請聯絡項目辦公室。
OUT069	Mandarin_Cantonese_PublicBriefing_Baseline	Baseline	Public Briefing	Mandarin*Cantonese	3	ChatGPT (this session)	0.8	2026-02-04	Write a public briefing for the project 'Sustainable Mobility Data Dashboard' for a Mandarin*Cantonese collaboration context.	【中文（普通话）】 公众通报——可持续出行数据仪表盘（18 Jan 2026） 我们在可持续出行数据仪表盘方面已API 集成已完成。目前正在处理公开发布中的隐私表述需完善，并将准备公众 FAQ。 如有疑问，请联系项目办公室。 【粵語】 公眾簡報——可持續出行數據Dashboard（18 Jan 2026） 我哋喺可持續出行數據Dashboard方面已經API 整合已完成。而家處理緊公開發布嘅私隱用詞要完善，之後會準備公眾 FAQ。 如有問題，請聯絡項目辦公室。
OUT070	Mandarin_Cantonese_PublicBriefing_CAP	CAP	Public Briefing	Mandarin*Cantonese	1	ChatGPT (this session)	0.8	2026-02-04	You are assisting a Mandarin/Cantonese internal working group in Australia. Task: Write a public briefing about 'Community Solar Microgrid Pilot'. Output: Provide bilingual content matching the language pair Mandarin*Cantonese. Style: Professional, culturally appropriate, considerate, and face-saving where relevant; use polite softeners, clear structure, and an inclusive Australian workplace tone…	【中文（普通话）】 公众通报——社区太阳能微电网试点（20 Jan 2026） 我们承认我们工作的土地之传统守护者，并向过去与现在的长者致以敬意。 最新进展 - 团队已在社区太阳能微电网试点方面已完成现场勘测。 - 我们正与合作伙伴共同管理逆变器供货周期偏长，并将尽早对外同步任何变更，减少信息不对称。 下一步 - 我们将共享更新后的时间表，并发布一份易读的公众 FAQ。 公众参与与支持 - 如您有疑问或需要语言/格式/口译等支持，请联系项目办公室，我们将尽力协助。 【粵語】 公眾簡報——社區太陽能微電網試點（20 Jan 2026） 我哋承認我哋工作嘅土地之傳統守護者，並向過去同而家嘅長者致敬。 最新進展 - 團隊已經喺社區太陽能微電網試點方面已完成現場勘測。 - 我哋正同合作夥伴一齊處理逆變器供貨期偏長，並會盡早公開任何改動，減少資訊落差。 下一步 - 我哋會分享更新後嘅時間表，同時發…
OUT071	Mandarin_Cantonese_PublicBriefing_CAP	CAP	Public Briefing	Mandarin*Cantonese	2	ChatGPT (this session)	0.8	2026-02-04	You are assisting a Mandarin/Cantonese internal working group in Australia. Task: Write a public briefing about 'Inclusive Digital Services Upgrade'. Output: Provide bilingual content matching the language pair Mandarin*Cantonese. Style: Professional, culturally appropriate, considerate, and face-saving where relevant; use polite softeners, clear structure, and an inclusive Australian workplace t…	【中文（普通话）】 公众通报——包容性数字服务升级（19 Jan 2026） 我们承认我们工作的土地之传统守护者，并向过去与现在的长者致以敬意。 最新进展 - 团队已在包容性数字服务升级方面已完成用户旅程草案测试。 - 我们正与合作伙伴共同管理翻译审核资源不足，并将尽早对外同步任何变更，减少信息不对称。 下一步 - 我们将确认审核排班，并发布一份易读的公众 FAQ。 公众参与与支持 - 如您有疑问或需要语言/格式/口译等支持，请联系项目办公室，我们将尽力协助。 【粵語】 公眾簡報——共融數碼服務升級（19 Jan 2026） 我哋承認我哋工作嘅土地之傳統守護者，並向過去同而家嘅長者致敬。 最新進展 - 團隊已經喺共融數碼服務升級方面已完成用戶旅程草案測試。 - 我哋正同合作夥伴一齊處理翻譯審核資源不足，並會盡早公開任何改動，減少資訊落差。 下一步 - 我哋會確認審核更表，同時發一份易明嘅…
OUT072	Mandarin_Cantonese_PublicBriefing_CAP	CAP	Public Briefing	Mandarin*Cantonese	3	ChatGPT (this session)	0.8	2026-02-04	You are assisting a Mandarin/Cantonese internal working group in Australia. Task: Write a public briefing about 'Sustainable Mobility Data Dashboard'. Output: Provide bilingual content matching the language pair Mandarin*Cantonese. Style: Professional, culturally appropriate, considerate, and face-saving where relevant; use polite softeners, clear structure, and an inclusive Australian workplace …	【中文（普通话）】 公众通报——可持续出行数据仪表盘（18 Jan 2026） 我们承认我们工作的土地之传统守护者，并向过去与现在的长者致以敬意。 最新进展 - 团队已在可持续出行数据仪表盘方面API 集成已完成。 - 我们正与合作伙伴共同管理公开发布中的隐私表述需完善，并将尽早对外同步任何变更，减少信息不对称。 下一步 - 我们将准备公众 FAQ，并发布一份易读的公众 FAQ。 公众参与与支持 - 如您有疑问或需要语言/格式/口译等支持，请联系项目办公室，我们将尽力协助。 【粵語】 公眾簡報——可持續出行數據Dashboard（18 Jan 2026） 我哋承認我哋工作嘅土地之傳統守護者，並向過去同而家嘅長者致敬。 最新進展 - 團隊已經喺可持續出行數據Dashboard方面API 整合已完成。 - 我哋正同合作夥伴一齊處理公開發布嘅私隱用詞要完善，並會盡早公開任何改動，減少資訊落差。…
