# Supplementary material for: Culturally-Aware Prompting in Conversational AI: Enhancing Digital Inclusion and Sustainable Collaboration for Cross-cultural Teams in Australia
Source: Research Square preprint supplement (doi:10.21203/rs.3.rs-8688430/v1), 2026-02-23
Supplement: Supplementary file 1 [file 75edcfdfcfd30337f2de4f48.docx]

Table 1. Normalized Score Mapping of Probability to Likert.

| **Politeness Probability** | **Discrete Likert** | **Normalized Score** |
| --- | --- | --- |
| 0.00≤ <0.20 | 1 | 0.00 |
| 0.20≤ <0.40 | 2 | 0.25 |
| 0.40≤ <0.60 | 3 | 0.50 |
| 0.60≤ <0.80 | 4 | 0.75 |
| 0.80≤ ≤1.00 | 5 | 1.00 |

Table 2. Brevity Penalty vs. Length Ratio.

| **Length Ratio** | **Brevity Penalty** |
| --- | --- |
| 0.5 | exp(1−2.0)=0.14 |
| 0.75 | exp(1−1.33)=0.34 |
| 1.0 | 1.00 |
| 1.25 | 1.00 |
| 1.5 | 1.00 |

Table 3. Summary of variables and their measurement scales.

| **Variable** | **Variable Name** | **Variable Symbol** | **Variable Measurement** |
| --- | --- | --- | --- |
| Explanatory Variable | Prompt Type |  | 0 = Plain Prompt; 1 = Culturally Aware Prompt. |
| Dependent Variable | Overall Collaboration Outcome Score |  | Average 1–5 Likert score assessing overall collaboration quality. |
| Human-Rated Output Quality | HR | Mean 1–5 Likert score across five evaluation dimensions. |
| Pragmatic Alignment Score | PA | Politeness classifier probability normalized to a 0–1 score. |
| Semantic Consistency Score | SC | BLEU-4 score (0–1) based on back-translated outputs. |
| Mediating Variable | Cultural Appropriateness |  | Human-rated 1–5 score of cultural and pragmatic appropriateness. |
| Pragmatic Politeness |  | Normalized politeness score (0–1) from classifier. |
| Control Variable | Language Pair | L | Mandarin*English / Cantonese*English / Mandarin*Cantonese. |
| Task Type | T | Email / Report / Meeting Minutes / Public Briefing. |
| Rater Identity | R | Three blind reviewers (random effect). |
| Output Sample ID | O | Sample 1–3 under each condition. |
| Model Temperature | - | Fixed at 0.8. |
| Model Identity | - | Fixed to ChatGPT-4o. |
| Evaluation Language (Back-translation) | - | Back-translation performed consistently using GPT-4o. |

Table 4. Descriptive Statistics of Human Ratings by Prompt Type (N = 72).

| **Dimension** | **Prompt Type** | **Mean** | **SD** | **Min** | **Max** |
| --- | --- | --- | --- | --- | --- |
| Cultural Appropriateness  (CA) | Baseline | 3.12 | 0.85 | 2.00 | 4.33 |
| CAP | 4.65 | 0.42 | 3.66 | 5.00 |
| Pragmatic Politeness  (PP) | Baseline | 3.25 | 0.78 | 2.33 | 4.66 |
| CAP | 4.72 | 0.35 | 4.00 | 5.00 |
| Readability & Professionalism  (RP) | Baseline | 3.88 | 0.65 | 2.66 | 5.00 |
| CAP | 4.55 | 0.48 | 3.33 | 5.00 |
| Task Completion  (TC) | Baseline | 4.10 | 0.55 | 3.00 | 5.00 |
| CAP | 4.48 | 0.45 | 3.66 | 5.00 |
| Risk of Misunderstanding *  (RM) | Baseline | 3.05 | 0.92 | 1.66 | 4.66 |
| CAP | 4.60 | 0.38 | 3.66 | 5.00 |

*Note: Risk of Misunderstanding is reverse-coded (1 = High Risk/Very Poor, 5 = Low Risk/Excellent).

Table 5. LMM fixed effects (N = 216).

| **Predictor** | **Estimate** (β) | **Std. Error** | **t-value** | **p-value** | **95% CI** |
| --- | --- | --- | --- | --- | --- |
| **Main Effects** | | | | | |
| Prompt Type (CAP) | 1.593 | 0.168 | 9.472 | < .001 | [1.264, 1.923] |
| Language: MC | 0.100 | 0.156 | 0.640 | .522 | [-0.206, 0.406] |
| Language: ME | -0.161 | 0.156 | -1.030 | .303 | [-0.467, 0.145] |
| Task: Meeting | -0.075 | 0.180 | -0.417 | .670 | [-0.427, 0.277] |
| Task: Public | -0.163 | 0.181 | -0.902 | .367 | [-0.517, 0.191] |
| Task: Report | 0.057 | 0.181 | 0.313 | .754 | [-0.297, 0.411] |
| **Two-way Interactions** | | | | | |
| Prompt × MC | -0.350 | 0.238 | -1.471 | .141 | [-0.816, 0.116] |
| Prompt × ME | 0.303 | 0.238 | 1.275 | .202 | [-0.163, 0.770] |
| Prompt × Meeting | -0.164 | 0.238 | -0.691 | .489 | [-0.631, 0.302] |
| Prompt × Public | -0.128 | 0.238 | -0.537 | .591 | [-0.594, 0.338] |
| Prompt × Report | 0.218 | 0.238 | 0.915 | .360 | [-0.248, 0.684] |
| **Three-way Interactions** | | | | | |
| P × MC × Meeting | 0.297 | 0.336 | 0.882 | .378 | [-0.363, 0.956] |
| P × ME × Meeting | -0.211 | 0.336 | -0.628 | .530 | [-0.870, 0.448] |
| P × MC × Public | -0.007 | 0.336 | -0.020 | .984 | [-0.666, 0.653] |
| P × ME × Public | -0.517 | 0.336 | -1.536 | .125 | [-1.176, 0.143] |
| P × MC × Report | 0.044 | 0.336 | 0.132 | .895 | [-0.615, 0.704] |
| P × ME × Report | -0.679 | 0.336 | -2.018 | .044 | [-1.338, -0.020] |

Table 6. Automated Metrics.

| **Metric** | **Baseline Mean** | **CAP Mean** | **Mean Diff** | **95% CI** | **SD (Baseline)** | **SD (CAP)** | **t-test** |
| --- | --- | --- | --- | --- | --- | --- | --- |
| PA | 0.35 | 0.82 | 0.47 | [0.38, 0.56] | 0.22 | 0.15 | 10.45 |
| SC | 0.76 | 0.79 | 0.03 | [−0.01, 0.07] | 0.11 | 0.08 | n.s. |

Table 7. Mann–Whitney U results.

| **Condition** | **U** | **p-value** | **Effect size r** |
| --- | --- | --- | --- |
| All outputs | 812 | < .001 | 0.42 |
| Mandarin–English | 196 | < .001 | 0.46 |
| Cantonese–English | 214 | 0.004 | 0.33 |
| Mandarin–Cantonese | 228 | 0.009 | 0.30 |
