# Supplementary material for: Culturally-Aware Prompting in Conversational AI: Enhancing Digital Inclusion and Sustainable Collaboration for Cross-cultural Teams in Australia
Source: Research Square preprint supplement (doi:10.21203/rs.3.rs-8688430/v1), 2026-02-23
Supplement: Supplementary file 2 [file 5fb77d67aea3fdc683fbca99.xlsx]

## Sheet: Cantonese
No.	Output ID	Language Pair	Task Type	CA (1–5)	PP (1–5)	RP (1–5)	TC (1–5)	RM (1–5)
1	OUT025	CAN-ENG	Formal Email	3	3	4	4	2
2	OUT026	CAN-ENG	Formal Email	3	4	4	3	3
3	OUT027	CAN-ENG	Formal Email	3	3	5	5	2
4	OUT028	CAN-ENG	Formal Email	5	5	3	4	5
5	OUT029	CAN-ENG	Formal Email	5	5	5	5	4
6	OUT030	CAN-ENG	Formal Email	4	4	5	5	5
7	OUT031	CAN-ENG	Meeting Minutes	3	4	4	4	4
8	OUT032	CAN-ENG	Meeting Minutes	3	4	5	4	4
9	OUT033	CAN-ENG	Meeting Minutes	1	5	3	4	4
10	OUT034	CAN-ENG	Meeting Minutes	5	4	5	4	5
11	OUT035	CAN-ENG	Meeting Minutes	4	5	4	5	5
12	OUT036	CAN-ENG	Meeting Minutes	5	4	5	4	5
13	OUT037	CAN-ENG	Project Report	4	4	5	4	2
14	OUT038	CAN-ENG	Project Report	3	4	5	4	3
15	OUT039	CAN-ENG	Project Report	5	4	3	5	4
16	OUT040	CAN-ENG	Project Report	5	5	4	4	5
17	OUT041	CAN-ENG	Project Report	4	5	5	5	4
18	OUT042	CAN-ENG	Project Report	4	5	5	5	5
19	OUT043	CAN-ENG	Public Briefing	5	3	4	4	2
20	OUT044	CAN-ENG	Public Briefing	3	2	3	4	3
21	OUT045	CAN-ENG	Public Briefing	4	3	4	4	3
22	OUT046	CAN-ENG	Public Briefing	5	5	5	4	5
23	OUT047	CAN-ENG	Public Briefing	5	5	4	4	4
24	OUT048	CAN-ENG	Public Briefing	5	5	4	4	5
25	OUT049	MAN-CAN	Formal Email	2	3	4	5	3
26	OUT050	MAN-CAN	Formal Email	4	4	3	5	5
27	OUT051	MAN-CAN	Formal Email	4	3	4	5	2
28	OUT052	MAN-CAN	Formal Email	5	4	5	5	5
29	OUT053	MAN-CAN	Formal Email	4	5	4	5	5
30	OUT054	MAN-CAN	Formal Email	5	4	5	4	5
31	OUT055	MAN-CAN	Meeting Minutes	2	3	4	4	2
32	OUT056	MAN-CAN	Meeting Minutes	3	5	4	3	3
33	OUT057	MAN-CAN	Meeting Minutes	3	3	4	4	3
34	OUT058	MAN-CAN	Meeting Minutes	5	5	4	4	5
35	OUT059	MAN-CAN	Meeting Minutes	5	5	5	5	4
36	OUT060	MAN-CAN	Meeting Minutes	5	4	5	5	5
37	OUT061	MAN-CAN	Project Report	4	4	4	5	2
38	OUT062	MAN-CAN	Project Report	2	3	5	4	3
39	OUT063	MAN-CAN	Project Report	4	2	3	5	2
40	OUT064	MAN-CAN	Project Report	5	4	5	5	5
41	OUT065	MAN-CAN	Project Report	5	4	5	5	4
42	OUT066	MAN-CAN	Project Report	4	5	5	4	5
43	OUT067	MAN-CAN	Public Briefing	4	3	5	4	2
44	OUT068	MAN-CAN	Public Briefing	1	3	4	4	1
45	OUT069	MAN-CAN	Public Briefing	3	4	4	5	5
46	OUT070	MAN-CAN	Public Briefing	4	5	5	4	5
47	OUT071	MAN-CAN	Public Briefing	5	5	4	5	5
48	OUT072	MAN-CAN	Public Briefing	4	5	4	3	5

## Sheet: Chinese
No.	Output ID	Language Pair	Task Type	CA (1–5)	PP (1–5)	RP (1–5)	TC (1–5)	RM (1–5)
1	OUT001	MAN-CAN	Formal Email	1	3	4	4	4
2	OUT002	MAN-CAN	Formal Email	4	4	3	5	5
3	OUT003	MAN-CAN	Formal Email	3	3	4	4	3
4	OUT004	MAN-CAN	Formal Email	5	5	4	5	4
5	OUT005	MAN-CAN	Formal Email	4	5	4	4	5
6	OUT006	MAN-CAN	Formal Email	5	4	4	5	4
7	OUT007	MAN-CAN	Meeting Minutes	2	2	4	3	2
8	OUT008	MAN-CAN	Meeting Minutes	3	5	4	4	3
9	OUT009	MAN-CAN	Meeting Minutes	3	3	4	4	3
10	OUT010	MAN-CAN	Meeting Minutes	5	5	4	5	4
11	OUT011	MAN-CAN	Meeting Minutes	5	4	5	4	4
12	OUT012	MAN-CAN	Meeting Minutes	5	4	5	5	5
13	OUT013	MAN-CAN	Project Report	3	4	5	4	2
14	OUT014	MAN-CAN	Project Report	2	3	4	5	2
15	OUT015	MAN-CAN	Project Report	3	2	4	4	3
16	OUT016	MAN-CAN	Project Report	5	5	4	5	4
17	OUT017	MAN-CAN	Project Report	5	4	5	4	5
18	OUT018	MAN-CAN	Project Report	4	5	5	5	5
19	OUT019	MAN-CAN	Public Briefing	3	3	5	3	3
20	OUT020	MAN-CAN	Public Briefing	1	3	3	5	1
21	OUT021	MAN-CAN	Public Briefing	2	3	4	4	5
22	OUT022	MAN-CAN	Public Briefing	4	5	5	5	4
23	OUT023	MAN-CAN	Public Briefing	4	4	4	4	5
24	OUT024	MAN-CAN	Public Briefing	4	5	4	3	4
25	OUT049	MAN-ENG	Formal Email	3	4	4	5	2
26	OUT050	MAN-ENG	Formal Email	3	3	3	4	2
27	OUT051	MAN-ENG	Formal Email	3	3	4	5	2
28	OUT052	MAN-ENG	Formal Email	5	5	5	4	5
29	OUT053	MAN-ENG	Formal Email	5	5	5	4	5
30	OUT054	MAN-ENG	Formal Email	5	4	5	4	5
31	OUT055	MAN-ENG	Meeting Minutes	4	3	4	4	3
32	OUT056	MAN-ENG	Meeting Minutes	3	3	3	4	4
33	OUT057	MAN-ENG	Meeting Minutes	4	3	4	4	4
34	OUT058	MAN-ENG	Meeting Minutes	4	5	5	5	5
35	OUT059	MAN-ENG	Meeting Minutes	5	5	4	5	5
36	OUT060	MAN-ENG	Meeting Minutes	4	4	5	4	5
37	OUT061	MAN-ENG	Project Report	4	4	4	4	2
38	OUT062	MAN-ENG	Project Report	4	3	3	4	5
39	OUT063	MAN-ENG	Project Report	4	3	3	5	4
40	OUT064	MAN-ENG	Project Report	4	5	5	4	5
41	OUT065	MAN-ENG	Project Report	5	5	5	5	5
42	OUT066	MAN-ENG	Project Report	4	5	5	4	5
43	OUT067	MAN-ENG	Public Briefing	4	4	3	5	2
44	OUT068	MAN-ENG	Public Briefing	4	1	3	3	3
45	OUT069	MAN-ENG	Public Briefing	3	4	2	5	4
46	OUT070	MAN-ENG	Public Briefing	5	5	5	5	5
47	OUT071	MAN-ENG	Public Briefing	5	5	4	4	3
48	OUT072	MAN-ENG	Public Briefing	4	5	5	4	4

## Sheet: English
No.	Output ID	Language Pair	Task Type	CA (1–5)	PP (1–5)	RP (1–5)	TC (1–5)	RM (1–5)
1	OUT001	CAN-ENG	Formal Email	3	3	5	3	3
2	OUT002	CAN-ENG	Formal Email	4	4	4	3	3
3	OUT003	CAN-ENG	Formal Email	2	3	5	4	2
4	OUT004	CAN-ENG	Formal Email	5	5	3	5	4
5	OUT005	CAN-ENG	Formal Email	5	4	5	4	5
6	OUT006	CAN-ENG	Formal Email	5	4	4	5	5
7	OUT007	CAN-ENG	Meeting Minutes	2	4	4	3	4
8	OUT008	CAN-ENG	Meeting Minutes	4	4	4	5	4
9	OUT009	CAN-ENG	Meeting Minutes	1	4	4	3	4
10	OUT010	CAN-ENG	Meeting Minutes	5	5	5	4	4
11	OUT011	CAN-ENG	Meeting Minutes	4	4	4	5	5
12	OUT012	CAN-ENG	Meeting Minutes	5	5	5	4	4
13	OUT013	CAN-ENG	Project Report	3	4	5	3	3
14	OUT014	CAN-ENG	Project Report	3	5	4	4	3
15	OUT015	CAN-ENG	Project Report	5	4	4	4	4
16	OUT016	CAN-ENG	Project Report	5	5	3	5	4
17	OUT017	CAN-ENG	Project Report	4	5	5	5	5
18	OUT018	CAN-ENG	Project Report	5	5	5	5	4
19	OUT019	CAN-ENG	Public Briefing	4	3	4	3	3
20	OUT020	CAN-ENG	Public Briefing	3	2	3	5	2
21	OUT021	CAN-ENG	Public Briefing	3	2	5	3	4
22	OUT022	CAN-ENG	Public Briefing	5	5	5	4	4
23	OUT023	CAN-ENG	Public Briefing	5	5	5	4	5
24	OUT024	CAN-ENG	Public Briefing	5	5	4	5	4
25	OUT025	MAN-ENG	Formal Email	3	3	4	5	3
26	OUT026	MAN-ENG	Formal Email	3	3	3	5	2
27	OUT027	MAN-ENG	Formal Email	2	2	4	5	2
28	OUT028	MAN-ENG	Formal Email	5	5	4	5	4
29	OUT029	MAN-ENG	Formal Email	5	5	5	4	5
30	OUT030	MAN-ENG	Formal Email	5	5	5	5	4
31	OUT031	MAN-ENG	Meeting Minutes	4	2	4	3	3
32	OUT032	MAN-ENG	Meeting Minutes	4	3	3	4	4
33	OUT033	MAN-ENG	Meeting Minutes	3	2	5	3	4
34	OUT034	MAN-ENG	Meeting Minutes	4	5	4	5	5
35	OUT035	MAN-ENG	Meeting Minutes	5	4	5	5	5
36	OUT036	MAN-ENG	Meeting Minutes	4	5	5	4	4
37	OUT037	MAN-ENG	Project Report	3	4	4	3	3
38	OUT038	MAN-ENG	Project Report	4	3	2	5	4
39	OUT039	MAN-ENG	Project Report	3	2	4	4	4
40	OUT040	MAN-ENG	Project Report	5	5	4	4	5
41	OUT041	MAN-ENG	Project Report	4	4	5	5	5
42	OUT042	MAN-ENG	Project Report	4	5	4	5	5
43	OUT043	MAN-ENG	Public Briefing	3	4	4	4	3
44	OUT044	MAN-ENG	Public Briefing	4	2	3	4	3
45	OUT045	MAN-ENG	Public Briefing	3	3	3	4	4
46	OUT046	MAN-ENG	Public Briefing	5	5	4	5	4
47	OUT047	MAN-ENG	Public Briefing	4	5	5	4	3
48	OUT048	MAN-ENG	Public Briefing	5	5	4	4	4
